# Supplementary material
Source: PubMed Central journal article supplement (PMC2646871)
Supplement: jm8001422-File003.pdf [file jm8001422-File003.pdf]

## Supporting Information:

# Novel Quinolinonyl Diketo Acid Derivatives as HIV-1 Integrase Inhibitors: Design, Synthesis and Biological Activities

Roberto Di Santo,<sup>\*,§</sup> Roberta Costi,<sup>§</sup> Alessandra Roux,<sup>§</sup> Gaetano Miele,<sup>§</sup> Giuliana Cuzzucoli Crucitti,<sup>§</sup> Alberto Iacovo,<sup>§</sup> Federica Rosi,<sup>§</sup> Antonio Lavecchia,<sup>^</sup> Luciana Marinelli,<sup>^</sup> Carmen Di Giovanni,<sup>^</sup> Ettore Novellino,<sup>^</sup> Lucia Palmisano,<sup>#</sup> Mauro Andreotti,<sup>#</sup> Roberta Amici,<sup>#</sup> Clementina Maria Galluzzo,<sup>#</sup> Lucia Nencioni,<sup>°</sup> Anna Teresa Palamara,<sup>°</sup> Yves Pommier,<sup>+</sup> and Christophe Marchand<sup>\*,+</sup>

*Istituto Pasteur - Fondazione Cenci Bolognetti, Dipartimento di Chimica e Tecnologie del Farmaco, Università di Roma "La Sapienza", Piazzale A. Moro 5, I-00185 Roma, Italy, Dipartimento Chimica Farmaceutica e Tossicologica, Università di Napoli "Federico II", via D. Montesano 49, I-80131 Napoli, Italy, Dipartimento del Farmaco, Istituto Superiore di Sanità, Dipartimento di Sanità Pubblica, Università di Roma "La Sapienza", P.le A. Moro 5, I-00185 Roma, Italy, Laboratory of Molecular Pharmacology, Center for Cancer Research, National Cancer Institute Building 37, Room 5068, National Institute of Health, Bethesda, MD 20892-4255, USA*

---

**Contents:** pages 1-2: spectroscopic data of derivatives **9a-g** and **10a-i**;

page 3-6: analyses of derivatives **5a-h**, **6a-h**, **7a,b** and **8a,b**.

## 1. Spectroscopic data.

**3-Acetyl-4(1H)-quinolinone (9a).**<sup>17</sup> IR  $\nu$  3420 (NH), 1644 and 1589 (C=O)  $\text{cm}^{-1}$ ; <sup>1</sup>H NMR (DMSO-*d*<sub>6</sub>)  $\delta$  2.64 (s, 3H, CH<sub>3</sub>), 7.41-7.49 (m, 1H, quinolinone C6-H), 7.51-7.76 (m, 2H, quinolinone C7-H and C8-H), 8.22-8.26 (m, 1H, quinolinone C5-H), 8.54 (s, 1H, quinolinone C2-H), 12.54 (bs, 1H, NH).

**3-Acetyl-6-fluoro-4(1H)-quinolinone (9b).** IR  $\nu$  3100 (NH), 1625 and 1656 (C=O)  $\text{cm}^{-1}$ ; <sup>1</sup>H NMR (DMSO-*d*<sub>6</sub>)  $\delta$  2.61 (s, 3H, CH<sub>3</sub>), 7.61 (m, 1H, quinolinone C7-H), 7.69 (m, 1H, quinolinone C8-H), 7.85 (m, 1H, quinolinone C5-H), 8.53 (s, 1H, quinolinone C2-H), 12.05 (bs, 1H, NH).

**3-Acetyl-7-fluoro-4(1H)-quinolinone (9c).** IR  $\nu$  3100 (NH), 1652 (C=O)  $\text{cm}^{-1}$ ; <sup>1</sup>H NMR (DMSO-*d*<sub>6</sub>)  $\delta$  2.59 (s, 3H, CH<sub>3</sub>), 7.25-7.31 (m, 1H, quinolinone C6-H), 7.36-7.39 (m, 1H, quinolinone C8-H), 8.23-8.27 (m, 1H, quinolinone C5-H), 8.53 (s, 1H, quinolinone C2-H), 12.50 (bs, 1H, NH).

**3-Acetyl-8-fluoro-4(1H)-quinolinone (9d).** IR  $\nu$  3100 (NH), 1614 and 1667 (C=O)  $\text{cm}^{-1}$ ; <sup>1</sup>H NMR (DMSO-*d*<sub>6</sub>)  $\delta$  2.59 (s, 3H, CH<sub>3</sub>), 7.38-7.44 (m, 1H, quinolinone C6-H), 7.63-7.67 (m, 1H, quinolinone C7-H), 8.01 (m, 1H, quinolinone C5-H), 8.34 (s, 1H, quinolinone C2-H), 12.63 (bs, 1H, NH).

**3-Acetyl-6-chloro-4(1H)-quinolinone (9e).**<sup>17</sup> IR  $\nu$  3080 (NH), 1600 and 1650 (C=O)  $\text{cm}^{-1}$ ; <sup>1</sup>H NMR (DMSO-*d*<sub>6</sub>)  $\delta$  2.63 (s, 3H, CH<sub>3</sub>), 7.60-7.80 (m, 2H, quinolinone C7-H and C8-H), 8.15 (m, 1H, quinolinone C5-H), 8.55 (s, 1H, quinolinone C2-H), 12.65 (bs, 1H, NH).

**3-Acetyl-7-chloro-4(1H)-quinolinone (9f).**<sup>17</sup> IR  $\nu$  3050 (NH), 1610 and 1650 (C=O)  $\text{cm}^{-1}$ ; <sup>1</sup>H NMR (DMSO-*d*<sub>6</sub>)  $\delta$  2.62 (s, 3H, CH<sub>3</sub>), 7.48 (m, 1H, quinolinone C6-H), 7.70 (m, 1H, quinolinone C8-H), 8.22 (m, 1H, quinolinone C5-H), 8.55 (s, 1H, quinolinone C2-H), 12.50 (bs, 1H, NH).

**3-Acetyl-8-chloro-4(1H)-quinolinone (9g).**<sup>17</sup> IR  $\nu$  3183 (NH), 1637 and 1670 (C=O)  $\text{cm}^{-1}$ ; <sup>1</sup>H NMR (DMSO-*d*<sub>6</sub>)  $\delta$  2.59 (s, 3H, CH<sub>3</sub>), 7.42 (m, 1H, quinolinone C6-H), 7.89 (m, 1H, quinolinone C7-H), 8.17 (m, 1H, quinolinone C5-H), 8.37 (s, 1H, quinolinone C2-H), 12.08 (bs, 1H, NH).

**3-Acetyl-6,7-dichloro-4(1H)-quinolinone (9h).** IR  $\nu$  3100 (NH), 1625 and 1654 (C=O)  $\text{cm}^{-1}$ ; <sup>1</sup>H NMR (DMSO-*d*<sub>6</sub>)  $\delta$  2.59 (s, 3H, CH<sub>3</sub>), 8.21 (s, 1H, quinolinone C8-H), 8.40 (s, 1H, quinolinone C5-H), 8.63 (s, 1H, quinolinone C2-H), 12.65 (bs, 1H, NH).

**3-Acetyl-1-(4-fluorophenyl)methyl-4(1H)-quinolinone (10a).** IR  $\nu$  1635 and 1660 (C=O)  $\text{cm}^{-1}$ ; <sup>1</sup>H NMR (DMSO-*d*<sub>6</sub>)  $\delta$  2.86 (s, 3H, CH<sub>3</sub>), 5.43 (s, 2H, CH<sub>2</sub>), 7.04-7.23 (m, 4H, benzene H), 7.30-7.66 (m, 3H, quinolinone C6-H, C7-H and C8-H), 8.58 (dd, 1H, J<sub>5,6</sub> = 8.0 Hz, J<sub>5,7</sub> = 1.6 Hz, quinolinone C5-H), 8.66 (s, 1H, quinolinone C2-H).

**3-Acetyl-6-fluoro-1-(4-fluorophenyl)methyl-4(1H)-quinolinone (10b).** IR  $\nu$  1656 (C=O)  $\text{cm}^{-1}$ ; <sup>1</sup>H NMR (DMSO-*d*<sub>6</sub>)  $\delta$  2.63 (s, 3H, CH<sub>3</sub>), 5.70 (s, 2H, CH<sub>2</sub>), 7.15-7.19 (m, 2H, benzene H), 7.28-7.32 (m, 2H, benzene H), 7.59-7.64 (m, 1H, quinolinone C7-H), 7.74-7.77 (m, 1H, quinolinone C8-H), 7.93-7.96 (m, 1H, quinolinone C5-H), 8.86 (s, 1H, quinolinone C2-H).

**3-Acetyl-7-fluoro-1-(4-fluorophenyl)methyl-4(1H)-quinolinone (10c).** IR  $\nu$  1638 and 1660 (C=O)  $\text{cm}^{-1}$ ; <sup>1</sup>H NMR (DMSO-*d*<sub>6</sub>)  $\delta$  2.63 (s, 3H, CH<sub>3</sub>), 5.65 (s, 2H, CH<sub>2</sub>), 7.14-7.21 (m, 2H, benzene H), 7.28-7.35 (m, 3H, benzene H and quinolinone C6-H), 7.55 (m, 1H, quinolinone C8-H), 8.34 (m, 1H, quinolinone C5-H), 8.83 (s, 1H, quinolinone C2-H).

**3-Acetyl-8-fluoro-1-(4-fluorophenyl)methyl-4(1H)-quinolinone (10d).** IR  $\nu$  1640 and 1660 (C=O)  $\text{cm}^{-1}$ ; <sup>1</sup>H NMR (DMSO-*d*<sub>6</sub>)  $\delta$  2.62 (s, 3H, CH<sub>3</sub>), 5.72 (s, 2H, CH<sub>2</sub>), 7.13-7.20 (m, 4H, benzene H), 7.43-7.50 (m, 1H, quinolinone C6-H), 7.54-7.60 (m, 1H, quinolinone C7-H), 8.16 (m, 1H, quinolinone C5-H), 8.75 (s, 1H, quinolinone C2-H).

**3-Acetyl-6-chloro-1-(4-fluorophenyl)methyl-4(1H)-quinolinone (10e).** IR  $\nu$  1620 and 1650 (C=O)  $\text{cm}^{-1}$ ; <sup>1</sup>H NMR (DMSO-*d*<sub>6</sub>)  $\delta$  2.67 (s, 3H, CH<sub>3</sub>), 5.73 (s, 2H, CH<sub>2</sub>), 7.10-7.30 (m, 4H, benzene H), 7.75-7.78 (m, 2H, quinolinone C7-H and C8-H), 8.25 (m, 1H, quinolinone C5-H), 8.90 (s, 1H, quinolinone C2-H).

**3-Acetyl-7-chloro-1-(4-fluorophenyl)methyl-4(1H)-quinolinone (10f).** IR  $\nu$  1635 and 1662 (C=O)  $\text{cm}^{-1}$ ; <sup>1</sup>H NMR (DMSO-*d*<sub>6</sub>)  $\delta$  2.62 (s, 3H, CH<sub>3</sub>), 5.66 (s, 2H, CH<sub>2</sub>), 7.16-7.21 (m, 2H, benzene H), 7.30-7.33 (m, 2H, benzene H), 7.49 (m, 1H, quinolinone C6-H), 7.78 (m, 1H, quinolinone C8-H), 8.27 (m, 1H, quinolinone C5-H), 8.82 (s, 1H, quinolinone C2-H).

**3-Acetyl-8-chloro-1-(4-fluorophenyl)methyl-4(1H)-quinolinone (10g).** IR  $\nu$  1640 and 1660 (C=O)  $\text{cm}^{-1}$ ; <sup>1</sup>H NMR (DMSO-*d*<sub>6</sub>)  $\delta$  2.62 (s, 3H, CH<sub>3</sub>), 6.04 (s, 2H, CH<sub>2</sub>), 7.13 (m, 4H, benzene H), 7.43-7.49 (m, 1H, quinolinone C6-H), 7.80 (m, 1H, quinolinone C7-H), 8.34 (m, 1H, quinolinone C5-H), 8.67 (s, 1H, quinolinone C2-H).

**3-Acetyl-6,7-dichloro-1-(4-fluorophenyl)methyl-4(1H)-quinolinone (10h).** IR  $\nu$  1620 and 1650 (C=O)  $\text{cm}^{-1}$ ; <sup>1</sup>H NMR (DMSO-*d*<sub>6</sub>)  $\delta$  2.62 (s, 3H, CH<sub>3</sub>), 5.67 (s, 2H, CH<sub>2</sub>), 7.12-7.34 (m, 4H, benzene H), 8.03 (s, 1H, quinolinone C8-H), 8.33 (m, 1H, quinolinone C5-H), 8.83 (s, 1H, quinolinone C2-H).

**3-Acetyl-1-(4-fluorophenyl)methyl-7-(pyrrolidin-1-yl)-4(1*H*)-quinolinone (10i).** IR  $\nu$  1631(C=O)  $\text{cm}^{-1}$ ;  $^1\text{H}$  NMR (DMSO- $d_6$ )  $\delta$  1.90-1.93 (m, 4H, pyrrolidine H), 2.62 (s, 3H,  $\text{CH}_3$ ), 3.18-3.22 (m, 4H, pyrrolidine H), 5.60 (s, 2H,  $\text{CH}_2$ ), 6.28 (m, 1H, quinolinone C8-H), 7.67 (m, 1H, quinolinone C6-H), 7.15-7.19 (m, 2H, benzene H), 7.31-7.35 (m, 2H, benzene H), 8.02 (m, 1H, quinolinone C5-H), 8.70 (s, 1H, quinolinone C2-H).

## 2. Analyses

| Compd     | Elemental Analyses Calculated/ Found |      |      |      |       |
|-----------|--------------------------------------|------|------|------|-------|
|           | C                                    | H    | N    | F    | Cl    |
| <b>5a</b> | 66.82                                | 4.59 | 3.53 | 4.81 | -     |
|           | 66.88                                | 4.58 | 3.53 | 4.82 | -     |
| <b>5b</b> | 63.91                                | 4.15 | 3.39 | 9.20 | -     |
|           | 64.10                                | 4.16 | 3.38 | 9.21 | -     |
| <b>5c</b> | 63.91                                | 4.15 | 3.39 | 9.20 | -     |
|           | 64.06                                | 4.15 | 3.39 | 9.23 | -     |
| <b>5d</b> | 63.91                                | 4.15 | 3.39 | 9.20 | -     |
|           | 63.71                                | 4.16 | 3.38 | 9.22 | -     |
| <b>5e</b> | 61.48                                | 3.99 | 3.26 | 4.42 | 8.25  |
|           | 61.53                                | 3.99 | 3.27 | 4.44 | 8.17  |
| <b>5f</b> | 61.48                                | 3.99 | 3.26 | 4.42 | 8.25  |
|           | 61.41                                | 3.98 | 3.26 | 4.44 | 8.16  |
| <b>5g</b> | 61.48                                | 3.99 | 3.26 | 4.42 | 8.25  |
|           | 61.65                                | 3.98 | 3.27 | 4.42 | 8.15  |
| <b>5h</b> | 56.91                                | 3.47 | 3.02 | 4.09 | 15.27 |
|           | 56.84                                | 3.47 | 3.02 | 4.11 | 15.35 |
| <b>5i</b> | 67.22                                | 5.43 | 6.03 | 4.09 | -     |

|           |       |      |      |      |       |
|-----------|-------|------|------|------|-------|
|           | 67.09 | 5.45 | 6.04 | 4.09 | -     |
| <b>6a</b> | 65.40 | 3.84 | 3.81 | 5.17 | -     |
|           | 65.27 | 4.02 | 3.89 | 5.16 | -     |
| <b>6b</b> | 62.34 | 3.40 | 3.64 | 9.86 | -     |
|           | 62.22 | 3.56 | 3.64 | 9.83 | -     |
| <b>6c</b> | 62.34 | 3.40 | 3.64 | 9.86 | -     |
|           | 62.28 | 3.64 | 3.62 | 9.86 | -     |
| <b>6d</b> | 62.34 | 3.40 | 3.64 | 9.86 | -     |
|           | 62.25 | 3.55 | 3.62 | 9.85 | -     |
| <b>6e</b> | 59.79 | 3.26 | 3.49 | 4.73 | 8.82  |
|           | 59.87 | 3.31 | 3.49 | 4.72 | 8.71  |
| <b>6f</b> | 59.79 | 3.26 | 3.49 | 4.73 | 8.82  |
|           | 59.63 | 3.42 | 3.47 | 4.74 | 8.73  |
| <b>6g</b> | 59.79 | 3.26 | 3.49 | 4.73 | 8.82  |
|           | 59.67 | 3.31 | 3.48 | 4.72 | 8.72  |
| <b>6h</b> | 55.07 | 2.77 | 3.21 | 4.36 | 16.25 |
|           | 55.18 | 2.79 | 3.23 | 4.37 | 16.34 |
| <b>6i</b> | 66.03 | 4.85 | 6.42 | 4.36 | -     |
|           | 66.10 | 4.86 | 6.40 | 4.36 | -     |
| <b>7a</b> | 56.00 | 3.76 | 4.35 | -    | 11.02 |
|           | 56.01 | 3.78 | 4.36 | -    | 10.86 |
| <b>7b</b> | 56.00 | 3.76 | 4.35 | -    | 11.02 |
|           | 56.09 | 3.76 | 4.37 | -    | 10.92 |
| <b>8a</b> | 53.17 | 2.75 | 4.77 | -    | 12.07 |
|           | 53.29 | 2.74 | 4.78 | -    | 11.95 |

|            |       |      |      |       |       |
|------------|-------|------|------|-------|-------|
| <b>8b</b>  | 53.17 | 2.75 | 4.77 | -     | 12.07 |
|            | 53.18 | 2.74 | 4.79 | -     | 11.97 |
| <b>9a</b>  | 70.58 | 4.85 | 7.48 | -     | -     |
|            | 70.63 | 4.67 | 7.46 | -     | -     |
| <b>9b</b>  | 64.39 | 3.93 | 6.83 | 9.26  | -     |
|            | 64.56 | 3.93 | 6.84 | 9.27  | -     |
| <b>9c</b>  | 64.39 | 3.93 | 6.83 | 9.26  | -     |
|            | 64.45 | 3.92 | 6.84 | 9.24  |       |
| <b>9d</b>  | 64.39 | 3.93 | 6.83 | 9.26  | -     |
|            | 64.55 | 3.93 | 6.81 | 9.25  |       |
| <b>9e</b>  | 59.61 | 3.64 | 6.32 | -     | 16.00 |
|            | 59.52 | 3.60 | 6.19 | -     | 16.02 |
| <b>9f</b>  | 59.61 | 3.64 | 6.32 | -     | 16.00 |
|            | 59.54 | 3.64 | 6.36 | -     | 15.96 |
| <b>9g</b>  | 59.61 | 3.64 | 6.32 | -     | 16.00 |
|            | 59.73 | 3.65 | 6.35 | -     | 15.87 |
| <b>9h</b>  | 51.59 | 2.76 | 5.47 | -     | 27.69 |
|            | 51.62 | 2.78 | 5.48 | -     | 27.53 |
| <b>10a</b> | 73.21 | 4.78 | 4.74 | 6.43  | -     |
|            | 73.27 | 4.79 | 4.75 | 6.44  | -     |
| <b>10b</b> | 69.01 | 4.18 | 4.47 | 12.13 | -     |
|            | 68.92 | 4.19 | 4.46 | 12.16 | -     |
| <b>10c</b> | 69.01 | 4.18 | 4.47 | 12.13 | -     |
|            | 68.95 | 4.19 | 4.48 | 12.15 | -     |
| <b>10d</b> | 69.01 | 4.18 | 4.47 | 12.13 | -     |

|            |       |      |      |       |       |
|------------|-------|------|------|-------|-------|
|            | 68.99 | 4.17 | 4.46 | 12.16 | -     |
| <b>10e</b> | 65.56 | 3.97 | 4.25 | 5.76  | 10.75 |
|            | 65.71 | 3.98 | 4.27 | 5.75  | 10.66 |
| <b>10f</b> | 65.56 | 3.97 | 4.25 | 5.76  | 10.75 |
|            | 65.60 | 3.97 | 4.26 | 5.79  | 10.61 |
| <b>10g</b> | 65.56 | 3.97 | 4.25 | 5.76  | 10.75 |
|            | 65.68 | 3.98 | 4.25 | 5.78  | 10.62 |
| <b>10h</b> | 59.36 | 3.32 | 3.85 | 5.22  | 19.47 |
|            | 59.42 | 3.33 | 3.85 | 5.22  | 19.30 |
| <b>10i</b> | 72.50 | 5.81 | 7.69 | 5.22  | -     |
|            | 72.57 | 5.81 | 7.68 | 5.24  | -     |

---
